# Supplementary material for: Selective nitration of phenol to o-nitrophenol in the presence of metal-free reduced graphene oxide at room temperature
Source: Royal Society of Chemistry journal article supplement (doi:10.1039/d0nj00885k), 2020-01-01
Supplement: d0nj00885k1.pdf [file d0nj00885k1.pdf]

## Supporting Information

### Selective Nitration of Phenol to *o*-Nitrophenol in the Presence of Metal Free Reduced Graphene Oxide at Room Temperature

Sourov Mondal, Jaydeep Singh, Shikha Singh, Sambhav Vishwakarma, Kheyath Mitra,  
Archana Kumari, Rajshree Singh, Susanta K. Sen Gupta, Biswajit Ray\*

Department of Chemistry, Institute of Science, Banaras Hindu University, Varanasi – 221005,  
India

\*Corresponding author's email: biswajitray2003@yahoo.co.in

**Figure S1.**  $^1\text{H}$  NMR ( $\text{CDCl}_3$ , 500 MHz) of the reaction mixture of nitration of phenol using GO as catalyst

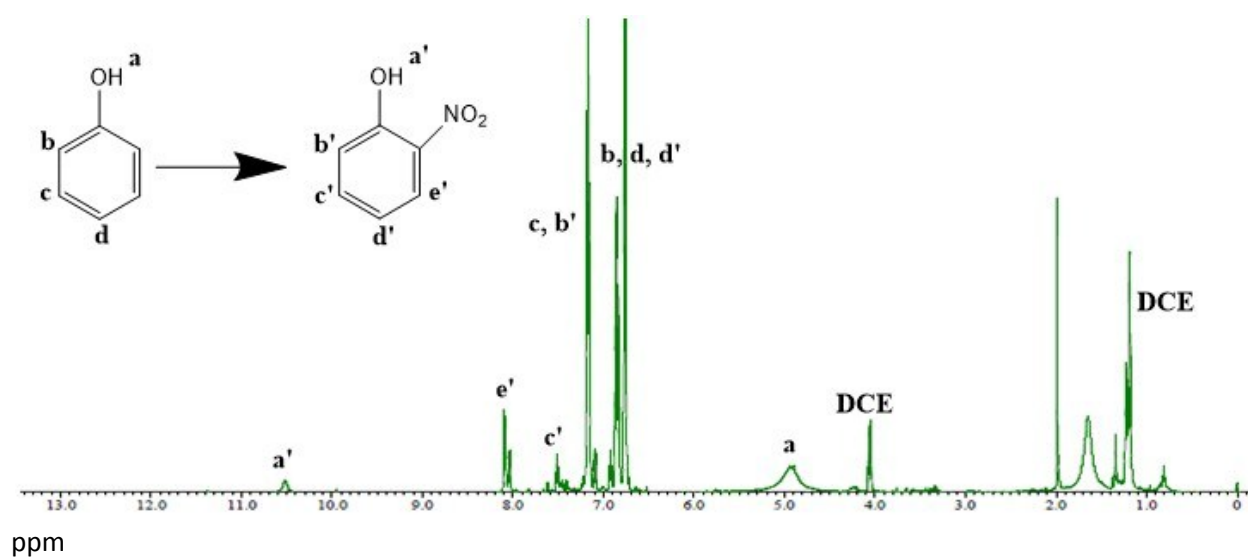

**Figure S2.**  $^1\text{H}$  NMR ( $\text{CDCl}_3$ , 500 MHz) of the reaction mixture of the nitration of phenol in the absence of catalyst

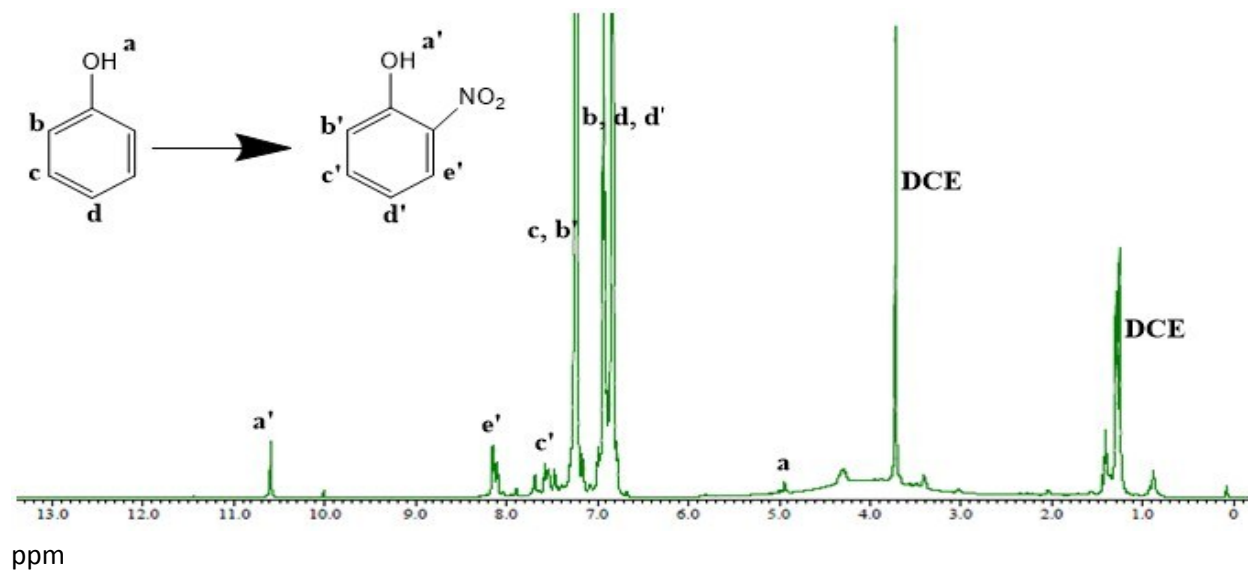

**Table S1.** Comparative Table for the results of the Nitration phenol using different catalysts

| Entry | Catalyst                                      | Nitrating reagent | Solvent              | Temperature (°C) | Time (h) | Conversion (%) | Selectivity of <i>o</i> -NP (%) | Selectivity of <i>p</i> -NP (%) | Selectivity of other products (%) | <i>O/P</i> ratio | Ref |
|-------|-----------------------------------------------|-------------------|----------------------|------------------|----------|----------------|---------------------------------|---------------------------------|-----------------------------------|------------------|-----|
| 1     | ZSM-5 Zeolite                                 | Nitric acid       | chloroform           | 25               | 2        | 95.5           | 30.9                            | 64.4                            | 4.50                              | 0.47             | 1   |
| 2     | Tetrabutylammonium dichromate (TBAD)          | Sodium nitrate    | DCE                  | 25               | 48       | 100            | 40                              | 40                              | —                                 | 1.0              | 2   |
| 3     | $\gamma$ -alumina                             | Nitric acid       | Carbon tetrachloride | 25               | 4.5      | 50             | 100                             | —                               | —                                 | —                | 3   |
| 4     | Silicotungstic acid supported zirconia (ZSTA) | Nitric acid       | DCM                  | 25               | 1        | 95             | 90                              | 10                              | —                                 | 9.0              | 4   |

|    |                                                                      |                                                                                   |                      |    |     |      |           |     |     |       |                  |
|----|----------------------------------------------------------------------|-----------------------------------------------------------------------------------|----------------------|----|-----|------|-----------|-----|-----|-------|------------------|
| 5  | p-toluene sulfonic acid (PTSA)                                       | Nickel nitrate hexahydrate [Ni(NO <sub>3</sub> ) <sub>2</sub> ·6H <sub>2</sub> O] | Acetone              | 25 | 0.5 | 100  | 85% Yield | —   | —   | —     | 5                |
| 6  | zeolite H-beta                                                       | Nitric acid                                                                       | Carbon tetrachloride | 25 | 2   | 96   | 87        | 10  | 3   | 8.70  | 6                |
| 7  | Iron loaded Sulfated Titania (STFE)                                  | Nitric acid                                                                       | Sol-gel rout         | 0  | 2   | 80.8 | 80.5      | 4.6 | 3.3 | 17.5  | 7                |
| 8  | Cromium loaded Sulfated Titania (STCR)                               | Nitric acid                                                                       | Sol-gel rout         | 0  | 2   | 90   | 97.5      | —   | 1.4 | —     | 8                |
| 9  | MoO <sub>3</sub> /TiO <sub>2</sub> -SiO <sub>2</sub> mixed oxide     | Nitric acid                                                                       | Carbon tetrachloride | 25 | 4   | 95   | 51        | 48  | 1   | 1.07  | 9                |
| 10 | WO <sub>3</sub> loaded on nano-crystalline sulfated SnO <sub>2</sub> | Nitric acid                                                                       | acetone              | 60 | —   | 97.8 | 94.2      | 3.6 | 2.2 | 26.17 | 10               |
| 11 | TBAB – ultrasonically assisted                                       | Nitric acid                                                                       | DCM                  | 25 | 6   | 95   | 83        | 16  | —   | 5.25  | 11               |
| 12 | silica supported H <sub>4</sub> PW <sub>11</sub> VO <sub>40</sub>    | Nitric acid                                                                       | DCE                  | 25 | 3   | 92   | 97        | 3   | —   | 32.33 | 12               |
| 13 | Reduced Graphene Oxide                                               | Nitric acid                                                                       | DCE                  | 25 | 3   | 98.3 | 100       | —   | —   | —     | <b>This work</b> |

## References

1. M. Arshadi, M. Ghiaci and A. Gil, Ind. Eng. Chem. Res. 2010, 49, 5504–5510

2. A.Pourali and A. Goli, *J. Chem. Sci.* 2011, 123, 63–67.
3. L. Das, K. G. Biswas, and J. K. Basu, *Progress Petrochem Sci.* 2018, 1, 1-13
4. S. Mallick and K.M. Parida, *Catalysis Communications.* 2007, 8, 1487–1492
5. V. Anuradha, P. V. Srinivas, P. Aparna and J. M. Rao, *Tetrahedron Letters* .2006, 47, 4933–4935
6. S.P. Dagade, V. S. Kadam and M.K. Dongare, *Catalysis Communications* .2002, 3, 367–370
7. K.R. Sunajadevi and S. Sugunan, *Materials Letters.* 2006, 60, 3813–3817
8. K.R. Sunajadevi and S. Sugunan, *Catalysis Communications.* 2005, 6, 611–616
9. S.M. Kemdeo, V.S. Sapkalb and G.N. Chaudharia, *Journal of Molecular Catalysis A: Chemical.* 2010,323, 70–77
10. A.S. Khder and A.I. Ahmed, *Applied Catalysis A: General.* 2009, 354, 153–160
11. N. S. Nandurkar, M. J. Bhanushali, S.R. Jagtap, B. M. Bhanage, *Ultrasonics Sonochemistry.* 2007 14 , 41–45
12. A.S.H.Kumar, K.T.V.Rao, K.Upendar, C.Sailu, N.Lingaiah and P.S.S.Prasad, *Catalysis Communications.* 2012, 18, 37–40
13. P.V. Ghorpade, D. A. Pethsangave, S. Some and G. S.Shankarling, *J. Org. Chem.* 2018, 83, 7388-7397
